# Supplementary material
Source: PubMed Central journal article supplement (PMC4771323)
Supplement: AEM.03398-15_zam999116956so1.pdf [file AEM.03398-15_zam999116956so1.pdf]

SUPPLEMENTAL SECTION

**Table S1.** Single copy genes used to evaluate the completeness of the *Thiobacillus* sp. RG5 draft genome.

| Description                                 | COG     | Count |
|---------------------------------------------|---------|-------|
| Arginyl-tRNA synthetase                     | COG0018 | 1     |
| DNA-directed RNA polymerase subunit alpha   | COG0202 | 1     |
| DNA-directed RNA polymerase subunit beta    | COG0085 | 2     |
| GTP-binding protein YchF                    | COG0012 | 1     |
| Histidyl-tRNA synthetase                    | COG0124 | 1     |
| Isoleucyl-tRNA synthetase                   | COG0060 | 1     |
| Leucyl-tRNA synthetase                      | COG0495 | 1     |
| Methionyl-tRNA synthetase                   | COG0143 | 2     |
| O-sialoglycoprotein endopeptidase           | COG0533 | 0     |
| Phenylalanyl-tRNA synthetase, alpha subunit | COG0016 | 1     |
| Protein translocase subunit secY alpha      | COG0201 | 1     |
| Ribosomal protein L1P                       | COG0081 | 1     |
| Ribosomal protein L22                       | COG0091 | 1     |
| Ribosomal protein L2P                       | COG0090 | 1     |
| Ribosomal protein L3P                       | COG0087 | 1     |
| Ribosomal protein L4P                       | COG0088 | 1     |
| Ribosomal protein L5P                       | COG0094 | 1     |
| Ribosomal protein L6P                       | COG0097 | 1     |
| Ribosomal protein L11P                      | COG0080 | 1     |
| Ribosomal protein L13P                      | COG0102 | 1     |
| Ribosomal protein L14P                      | COG0093 | 1     |
| Ribosomal protein L15P                      | COG0200 | 1     |
| Ribosomal protein L16P                      | COG0197 | 1     |
| Ribosomal protein L18                       | COG0256 | 1     |
| Ribosomal protein S2P                       | COG0052 | 1     |
| Ribosomal protein S3P                       | COG0092 | 1     |
| Ribosomal protein S4P                       | COG0522 | 1     |

---

| Description                              | COG     | Count |
|------------------------------------------|---------|-------|
| Ribosomal protein S5P                    | COG0098 | 1     |
| Ribosomal protein S7P                    | COG0049 | 1     |
| Ribosomal protein S8P                    | COG0096 | 1     |
| Ribosomal protein S9P                    | COG0103 | 1     |
| Ribosomal protein S11P                   | COG0100 | 1     |
| Ribosomal protein S12P                   | COG0048 | 1     |
| Ribosomal protein S13P                   | COG0099 | 1     |
| Ribosomal protein S15P/S13E              | COG0184 | 1     |
| Ribosomal protein S17P                   | COG0186 | 1     |
| Ribosomal protein S19P                   | COG0185 | 1     |
| Ribosomal protein alanyl-tRNA synthetase | COG0525 | 0     |
| Seryl-tRNA synthetase                    | COG0172 | 1     |
| Signal recognition particle subunit FFH  | COG0541 | 1     |

---

**Table S2.** Model parameters describing logistic  $\text{SO}_4^{2-}$  production in cultures of *Thiobacillus* sp. RG4 incubated at 5 or 15 °C. Values represent the average of triplicate biotic assays. Errors are  $2\sigma$ .

|       | <b>Oxidant</b>               | <b><math>t_{\text{half}}^{\text{a}}</math><br/>(h)</b> | <b><math>C_{\text{max}}^{\text{b}}</math><br/>(mM)</b> | <b><math>\alpha^{\text{c}}</math><br/>(mM h<sup>-1</sup>)</b> | <b>R<sup>2</sup></b> |
|-------|------------------------------|--------------------------------------------------------|--------------------------------------------------------|---------------------------------------------------------------|----------------------|
| 5 °C  | O <sub>2</sub>               | 223 ± 4                                                | 11.3 ± 0.2                                             | 1.7 x 10 <sup>-2</sup> ± 0.1 x 10 <sup>-2</sup>               | 0.99                 |
|       | NO <sub>3</sub> <sup>-</sup> | 630 ± 22                                               | 7.9 ± 0.4                                              | 7.6 x 10 <sup>-3</sup> ± 0.9 x 10 <sup>-3</sup>               | 0.99                 |
|       | NO <sub>2</sub> <sup>-</sup> | 1508 ± 44                                              | 4.6 ± 0.4                                              | 5.1 x 10 <sup>-3</sup> ± 0.8 x 10 <sup>-3</sup>               | 0.98                 |
| 15 °C | O <sub>2</sub>               | 243 ± 18                                               | 12.5 ± 0.8                                             | 1.3 x 10 <sup>-2</sup> ± 0.3 x 10 <sup>-2</sup>               | 0.98                 |
|       | NO <sub>3</sub> <sup>-</sup> | 826 ± 18                                               | 7.5 ± 0.4                                              | 8.8 x 10 <sup>-3</sup> ± 1.1 x 10 <sup>-3</sup>               | 0.99                 |
|       | NO <sub>2</sub> <sup>-</sup> | --                                                     | --                                                     | --                                                            | --                   |

<sup>a</sup> Time ( $t$ ) at which half the total  $\text{SO}_4^{2-}$  is produced. <sup>b</sup> Maximum  $\text{SO}_4^{2-}$  concentration predicted to accumulate. <sup>c</sup> Maximum rate of sulfate production observed.

**Table S3.** Parameters describing cell production via  $S_2O_3^{2-}$  oxidation coupled to  $O_2$  and  $NO_3^-$  reduction in cultures of *Thiobacillus* sp. RG5 incubated at 5 or 15 °C. Values represent the average of triplicate biotic assays and errors are  $2\sigma$  unless otherwise noted.

| <i>Oxidant</i>               | °C | $t_{half}^{a,d}$<br>(h) | $C_{max}^{b,d}$<br>(cells ml <sup>-1</sup> )  | $\alpha^{c,d}$<br>(cells h <sup>-1</sup> )      | $R^2$       | $t_D$<br>(h) | $E_c^e$<br>( $\mu J$ cell <sup>-1</sup> ) | $p$ (E <sub>c</sub> ) |
|------------------------------|----|-------------------------|-----------------------------------------------|-------------------------------------------------|-------------|--------------|-------------------------------------------|-----------------------|
| O <sub>2</sub>               | 5  | 247 ± 46                | 5.6 x 10 <sup>8</sup> ± 1.2 x 10 <sup>8</sup> | 1.5 x 10 <sup>-2</sup> ± 0.8 x 10 <sup>-2</sup> | 0.95        | 140          | 3.2 ± 0.6                                 | < 0.01                |
|                              | 15 | 176 ± 55                | 2.3 x 10 <sup>8</sup> ± 0.4 x 10 <sup>8</sup> | 1.2 x 10 <sup>-2</sup> ± 0.8 x 10 <sup>-2</sup> | 0.89        | 294          | 7.7 ± 2.4                                 |                       |
| NO <sub>3</sub> <sup>-</sup> | 5  | <i>n.a.</i>             | <i>n.a.</i>                                   | <i>n.a.</i>                                     | <i>n.a.</i> | 154          | 2.3 ± 1.7                                 | 0.07                  |
|                              | 15 | <i>n.a.</i>             | <i>n.a.</i>                                   | <i>n.a.</i>                                     | <i>n.a.</i> | 197          | 7.6 ± 3.4                                 |                       |

<sup>a</sup> Time ( $t$ ) at which half the total cells are produced. <sup>b</sup> Maximum predicted cell density.

<sup>c</sup> Maximum rate of cell production. <sup>d</sup> Values derived from logistic model. <sup>e</sup> Errors are  $1\sigma$ .
